# Supplementary material for: Comparative Phenotypic and Agronomic Assessment of Transgenic Potato with 3R-Gene Stack with Complete Resistance to Late Blight Disease
Source: MDPI journal article supplement (doi:10.3390/biology10100952), 2021-09-23
Supplement: s1 [file s1]

## Supplementary data

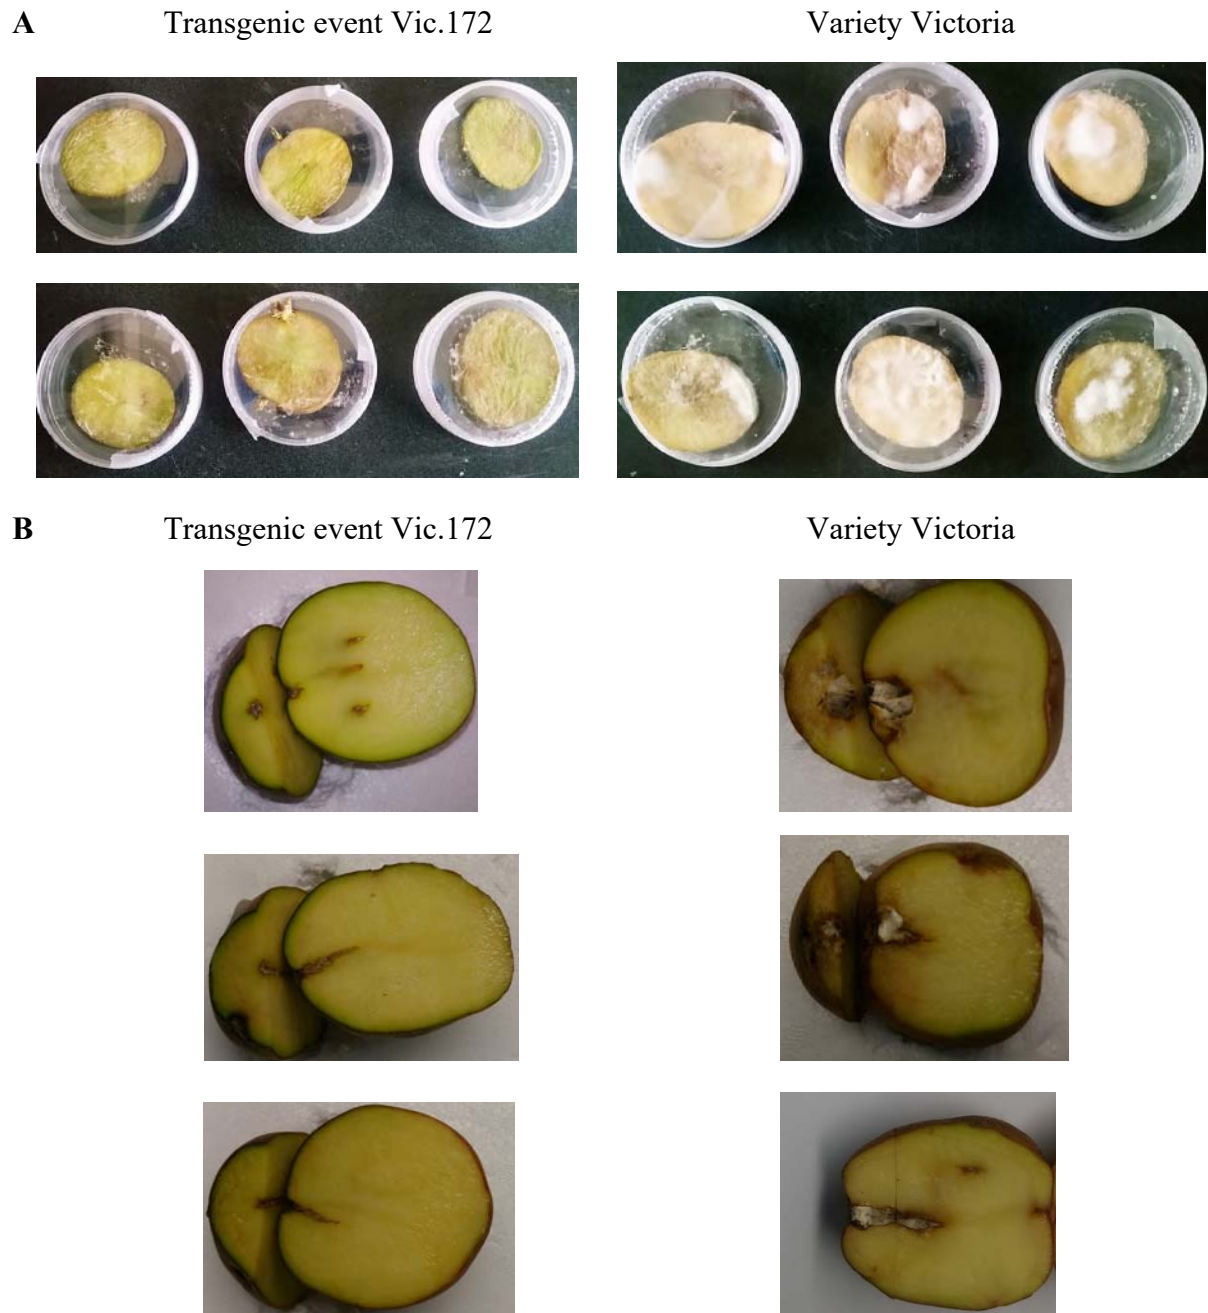

**Figure S1:** Tuber blight resistance assays from field-grown transgenic event Vic.172 and the variety Victoria were inoculated with *Phytophthora infestans* and evaluated 23 days post inoculation: A Tuber slices; B Half tubers infected through a hole.

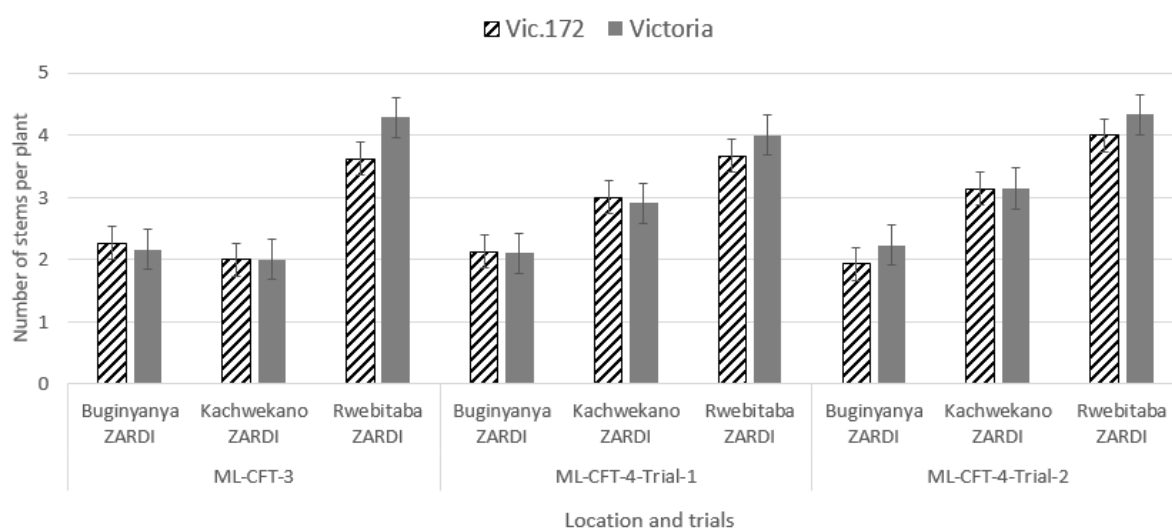

**Figure S2.** Average number of stems per planted tuber for the transgenic event Vic.172 and the variety Victoria at three locations during the three trials. Error bar represents the standard error.

**Table S1.** ANOVA of the number of stems per planted tubers for the transgenic event Vic.172 and the variety Victoria at three locations during the three trials.

| Source of variation | d.f. <sup>1</sup> | s.s. <sup>2</sup> | m.s. <sup>3</sup> | v.r. <sup>4</sup> | F pr. <sup>5</sup> |
|---------------------|-------------------|-------------------|-------------------|-------------------|--------------------|
| Genotype            | 1                 | 2.453             | 2.453             | 1.47              | 0.226              |
| Location            | 2                 | 271.644           | 135.822           | 81.34             | <.001              |
| Genotype X Location | 2                 | 4.24              | 2.12              | 1.27              | 0.282              |
| Residual            | 438               | 731.346           | 1.67              |                   |                    |
| Total               | 443               | 1009.682          |                   |                   |                    |

<sup>1</sup> DF = Degrees of freedom, <sup>2</sup> Sum of squares, <sup>3</sup> Mean squares, <sup>4</sup> Variance ratio, <sup>5</sup> F-Value at 5% level of significance.

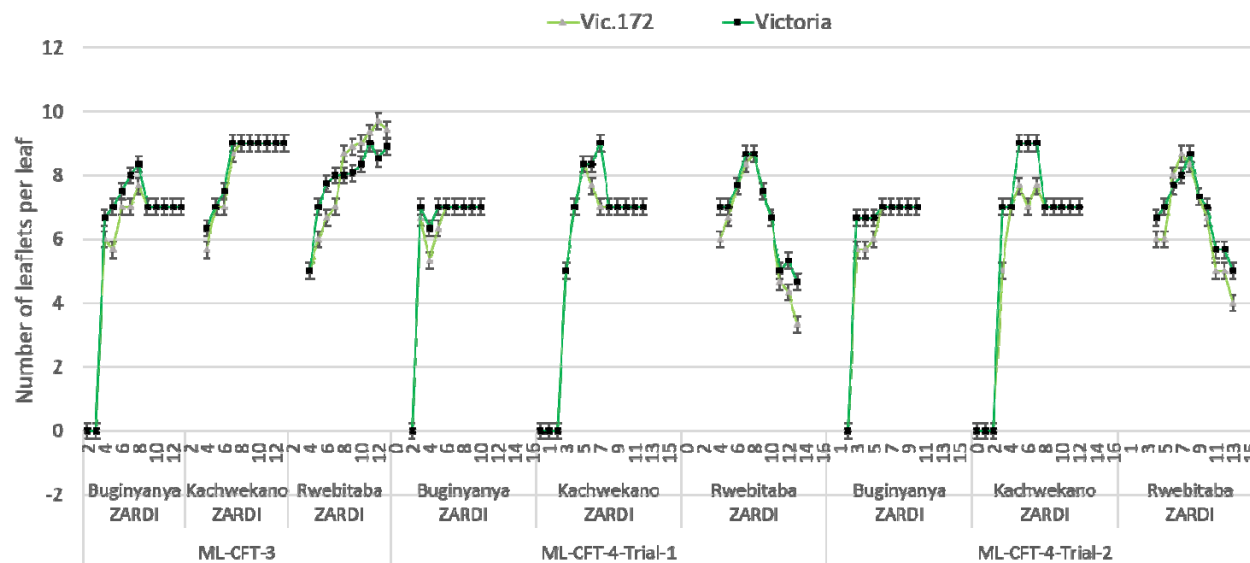

**Figure S3.** Number of leaflets per leaves observed at each location for the transgenic event Vic.172 and the variety Victoria during the three trials. Error bar represents the standard error.

**Table S2.** ANOVA of the number of leaflets per leaves observed in plots of the transgenic event Vic.172 and the variety Victoria at each location during the three trials.

| Source of variation | d.f. <sup>1</sup> | s.s. <sup>2</sup> | m.s. <sup>3</sup> | v.r. <sup>4</sup> | F pr. <sup>5</sup> |
|---------------------|-------------------|-------------------|-------------------|-------------------|--------------------|
| Genotype            | 1                 | 9.789             | 9.789             | 1.69              | 0.194              |
| Location            | 2                 | 117.507           | 58.754            | 10.15             | <.001              |
| Genotype X Location | 2                 | 0.114             | 0.057             | 0.01              | 0.99               |
| Residual            | 606               | 3506.996          | 5.787             |                   |                    |
| Total               | 611               | 3634.407          |                   |                   |                    |

<sup>1</sup> DF = Degrees of freedom, <sup>2</sup> Sum of squares, <sup>3</sup> Mean squares, <sup>4</sup> Variance ratio, <sup>5</sup> F-Value at 5% level of significance.

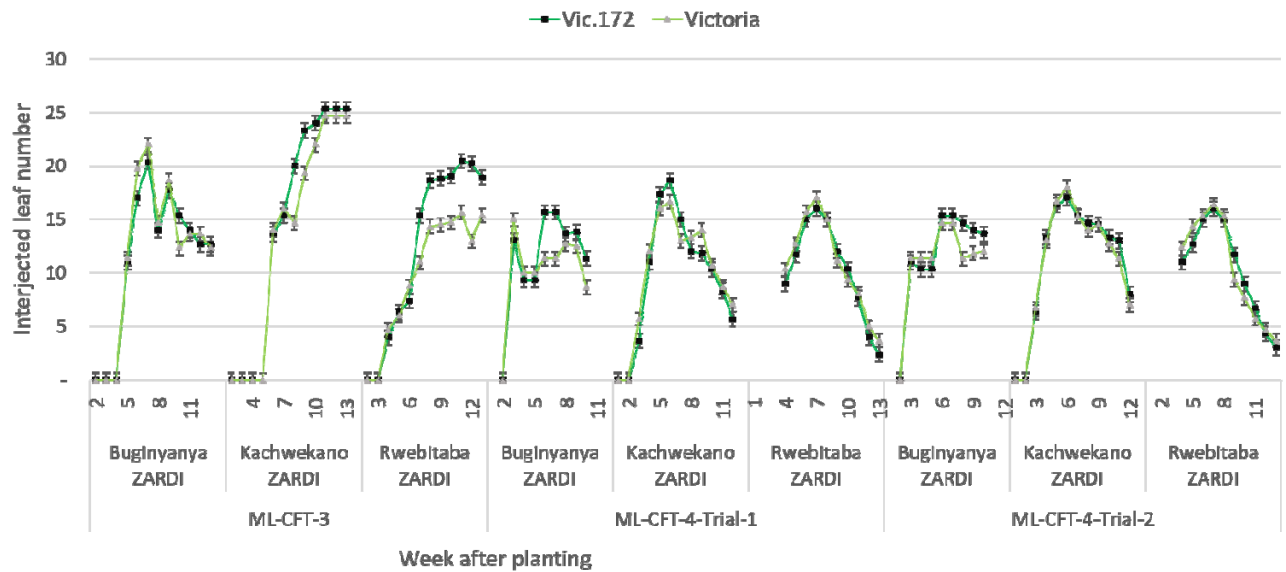

**Figure S4.** Average number of interjected leaves observed in plots of the transgenic event Vic.172 and the variety Victoria at each location during the three trials. Error bar represents the standard error.

**Table S3.** ANOVA for the average number of interjected leaves observed in plots of the transgenic event Vic.172 and the variety Victoria at each location during the three trials.

| Source of variation | d.f. <sup>1</sup> | s.s. <sup>2</sup> | m.s. <sup>3</sup> | v.r. <sup>4</sup> | F pr. <sup>5</sup> |
|---------------------|-------------------|-------------------|-------------------|-------------------|--------------------|
| Genotype            | 1                 | 53.25             | 53.25             | 1.23              | 0.267              |
| Location            | 2                 | 41.82             | 20.91             | 0.48              | 0.617              |
| Genotype X Location | 2                 | 7.48              | 3.74              | 0.09              | 0.917              |
| Residual            | 623               | 26927.01          | 43.22             |                   |                    |
| Total               | 628               | 27029.56          |                   |                   |                    |

<sup>1</sup> DF = Degrees of freedom, <sup>2</sup> Sum of squares, <sup>3</sup> Mean squares, <sup>4</sup> Variance ratio, <sup>5</sup> F-Value at 5% level of significance.

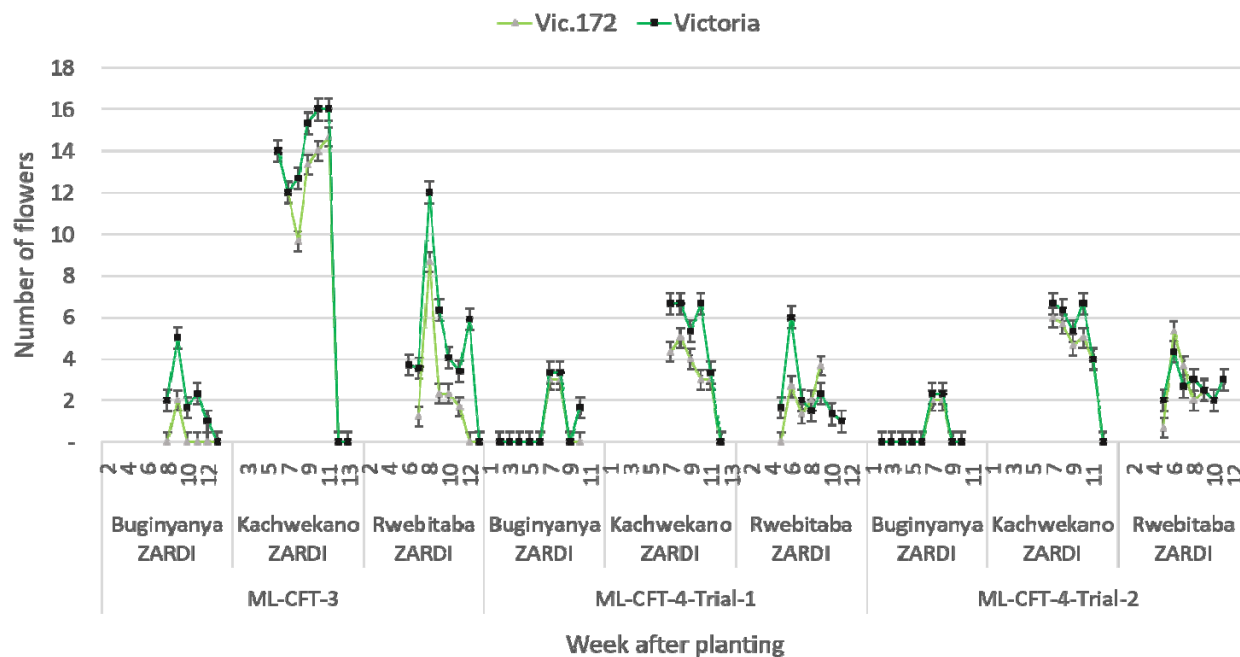

**Figure S5.** Flowering degree per plant in plots of the transgenic event Vic.172 and the variety Victoria at each location during the three trials. Error bar represents the standard error.

**Table S4.** ANOVA for flowering observed in plots of the transgenic event Vic.172 and the variety Victoria at each location during the three trials.

| Source of variation | d.f. <sup>1</sup> | s.s. <sup>2</sup> | m.s. <sup>3</sup> | v.r. <sup>4</sup> | F pr. <sup>5</sup> |
|---------------------|-------------------|-------------------|-------------------|-------------------|--------------------|
| Genotype            | 1                 | 4.26              | 4.26              | 0.4               | 0.53               |
| Location            | 2                 | 1094.63           | 547.31            | 50.83             | <.001              |
| Genotype X Location | 2                 | 14.88             | 7.44              | 0.69              | 0.502              |
| Residual            | 231               | 2487.51           | 10.77             |                   |                    |
| Total               | 236               | 3601.27           | 15.26             |                   |                    |

<sup>1</sup> DF = Degrees of freedom, <sup>2</sup> Sum of squares, <sup>3</sup> Mean squares, <sup>4</sup> Variance ratio, <sup>5</sup> F-Value at 5% level of significance.

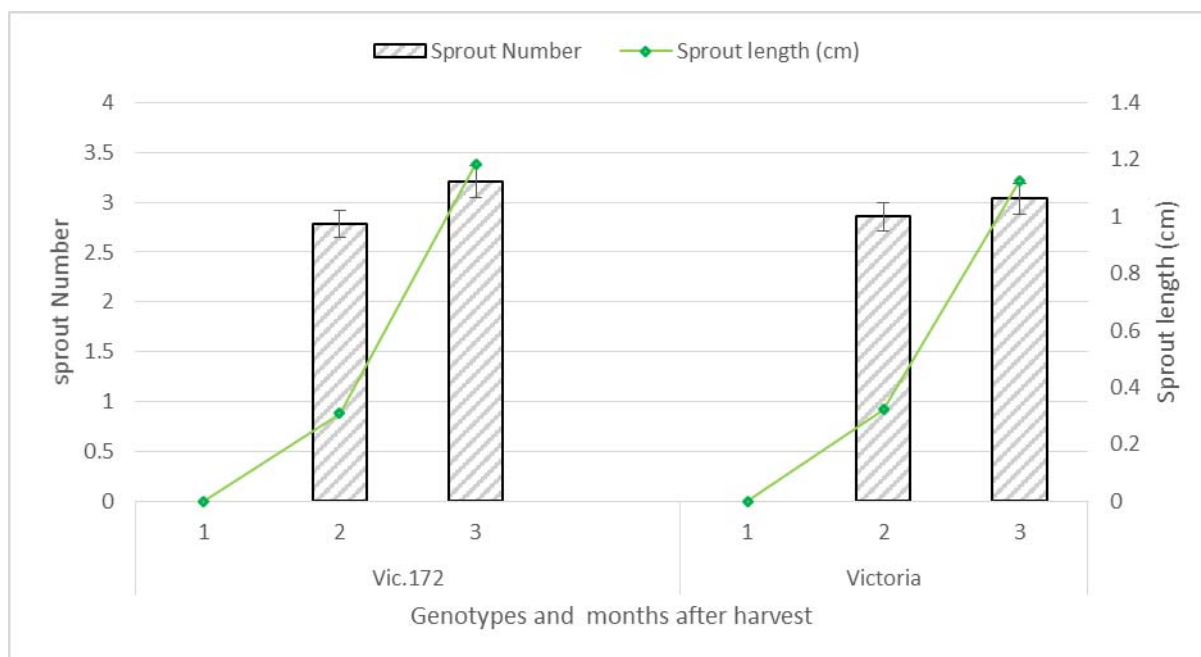

**Figure S6.** Number of sprouts and sprout length observed during the three months of storage before planting for the transgenic event Vic.172 and the variety Victoria. Error bar represents the standard error

**Table S5.** ANOVA for number of sprouts (A) and sprout length (B) for the transgenic event Vic.172 and the variety Victoria.

**A**

| Source of variation | d.f. <sup>1</sup> | s.s. <sup>2</sup> | m.s. <sup>3</sup> | v.r. <sup>4</sup> | F pr. <sup>5</sup> |
|---------------------|-------------------|-------------------|-------------------|-------------------|--------------------|
| Genotype            | 1                 | 0.054             | 0.054             | 0.02              | 0.895              |
| Residual            | 166               | 512.893           | 3.09              |                   |                    |
| Total               | 167               | 512.946           |                   |                   |                    |

**B**

| Source of variation | d.f. <sup>1</sup> | s.s. <sup>2</sup> | m.s. <sup>3</sup> | v.r. <sup>4</sup> | F pr. <sup>5</sup> |
|---------------------|-------------------|-------------------|-------------------|-------------------|--------------------|
| Genotype            | 1                 | 0.0101            | 0.0101            | 0.04              | 0.846              |
| Residual            | 166               | 43.9877           | 0.265             |                   |                    |
| Total               | 167               | 43.9978           |                   |                   |                    |

<sup>1</sup> DF = Degrees of freedom, <sup>2</sup> Sum of squares, <sup>3</sup> Mean squares, <sup>4</sup> Variance ratio, <sup>5</sup> F-Value at 5% level of significance.
